# Supplementary material for: Dual-functional PCN-242 (Fe 2 Co) MOF for sensitive bacterial endotoxin detection
Source: Royal Society of Chemistry journal article supplement (doi:10.1039/d4tb01944j), 2024-11-12
Supplement: d4tb01944j1.pdf [file d4tb01944j1.pdf]

1     **Dual-Functional PCN-242 (Fe<sub>2</sub>Co) MOF for Sensitive Bacterial Endotoxin**  
2     **Detection**

3     Sivasankar Kulandaivel,<sup>a</sup> Yung-Kang Lu, <sup>a</sup> Chia-Her Lin\*<sup>b</sup> and Yi-Chun Yeh\*<sup>a</sup>

4     <sup>a</sup> Department of Chemistry, National Taiwan Normal University, Taipei 11677,  
5     Taiwan.

6     <sup>b</sup> Department of Chemistry, National Tsing Hua University, Hsinchu 300044,  
7     Taiwan.

8

9

10

11     \*Corresponding authors: Chia-Her Lin and Yi-Chun Yeh

12

13

14 **Table S1:** The ICP-MS data validation for Fe<sub>2</sub>Co cluster before and after MOF  
15 synthesis.

16

|                                                                                     | Fe (wt%) | Co (wt%) | Fe: Co ratio in the cluster |
|-------------------------------------------------------------------------------------|----------|----------|-----------------------------|
| [Fe <sub>2</sub> Co(μ <sub>3</sub> -O) (CH <sub>3</sub> COO) <sub>6</sub> ] cluster | 15.50    | 8.568    | 1.81: 1                     |
| PCN-242 (Fe <sub>2</sub> Co) MOF                                                    | 11.40    | 4.467    | 2.55: 1                     |

17

18

19 **Table S2:** Comparison of steady-state kinetics of PCN-242(Fe<sub>2</sub>Co) with HRP and  
20 other iron-based MOFs for POD-like enzymatic activity.

21

| Substrate                     | Samples                            | Km (mM) | Vmax (10 <sup>-8</sup> M S <sup>-1</sup> ) | References |
|-------------------------------|------------------------------------|---------|--------------------------------------------|------------|
| H <sub>2</sub> O <sub>2</sub> | HRP enzyme                         | 3.7     | 8.71                                       | 1          |
|                               | Fe-MOF-GOx                         | 1.3     | 2.5                                        | 2          |
|                               | hemin@MIL-53(Al)-NH <sub>2</sub>   | 10.90   | 8.98                                       | 3          |
|                               | NH <sub>2</sub> -MIL-88B(Fe)       | 0.91    | -                                          | 4          |
|                               | Fe/Co-MIL-88(NH <sub>2</sub> )     | 0.71    | -                                          | 4          |
|                               | Fe/Co-TPY-MIL-88(NH <sub>2</sub> ) | 0.69    | 9.8                                        | 5          |
|                               | PCN-242 (Fe <sub>2</sub> Co) MOF   | 0.607   | 7.01                                       | This work  |

22

23

24

25

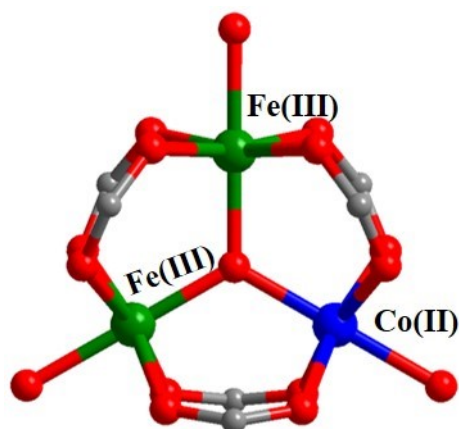

26 **Figure S1:** The schematic structure of the pre-made  $[\text{Fe}_2\text{Co}(\mu_3\text{-O})]$  cluster is used as  
 27 the starting material for PCN-242 ( $\text{Fe}_2\text{Co}$ ) MOF.

28

29

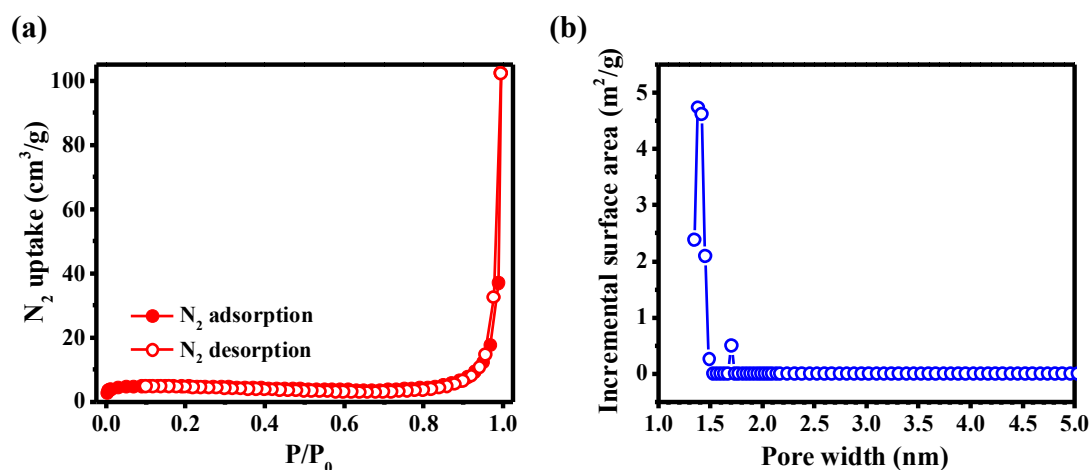

30

31 **Figure S2:** (a) Nitrogen adsorption-desorption isotherm of PCN-242( $\text{Fe}_2\text{Co}$ ) MOF. (b)  
 32 Incremental pore surface area distribution from NLDFT, highlighting pore structure  
 33 characteristics.

34

35

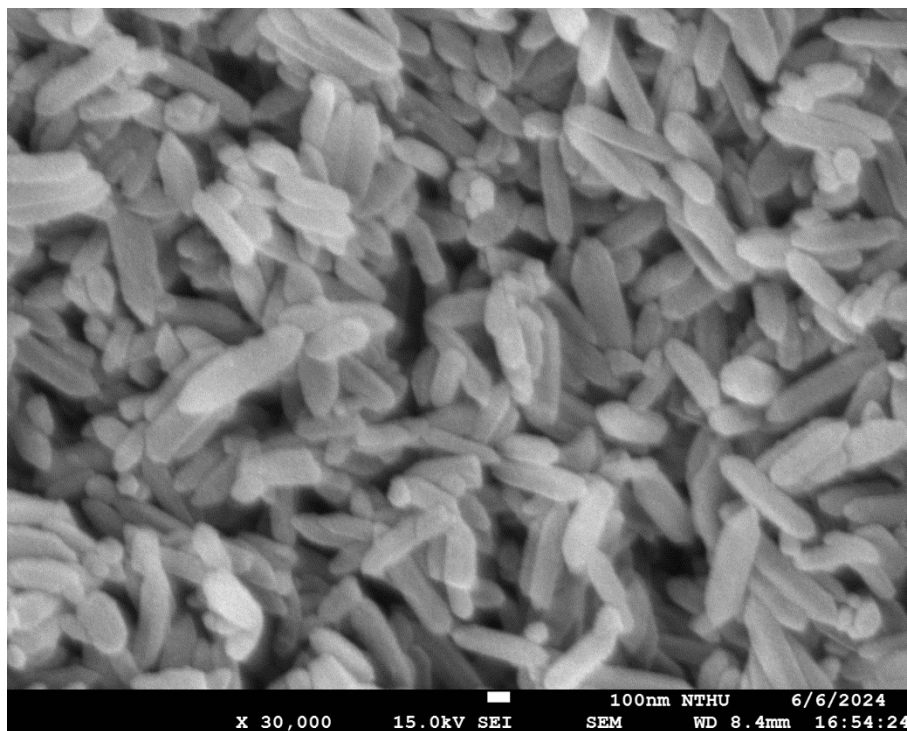

36

37

38 **Figure S3:** The synthesized PCN-242 (Fe<sub>2</sub>Co) MOF FE-SEM image.

39

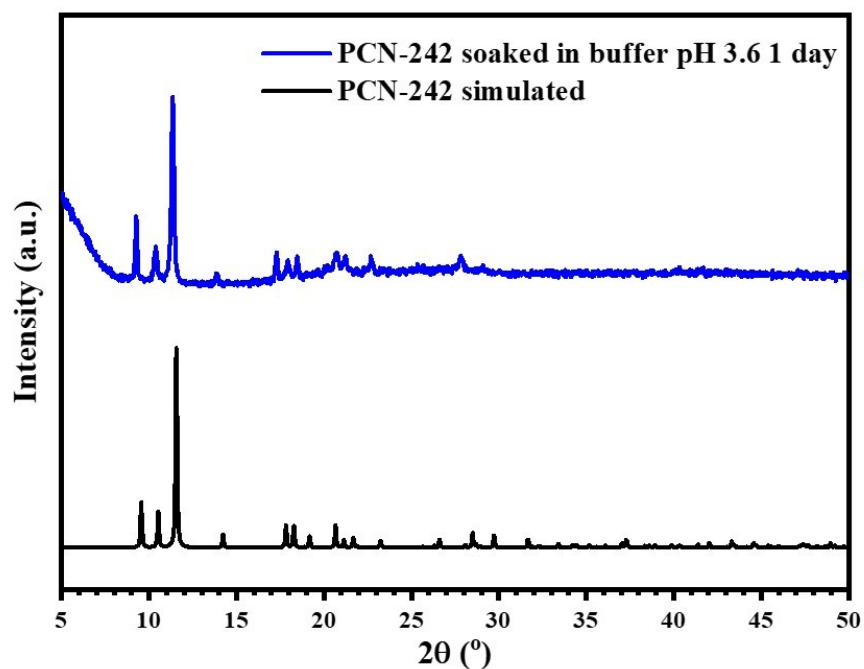

40

41 **Figure S4:** The PXRD pattern of PCN-242 (Fe<sub>2</sub>Co) MOF soaked in an acidic buffer

42 one day at pH 3.6.

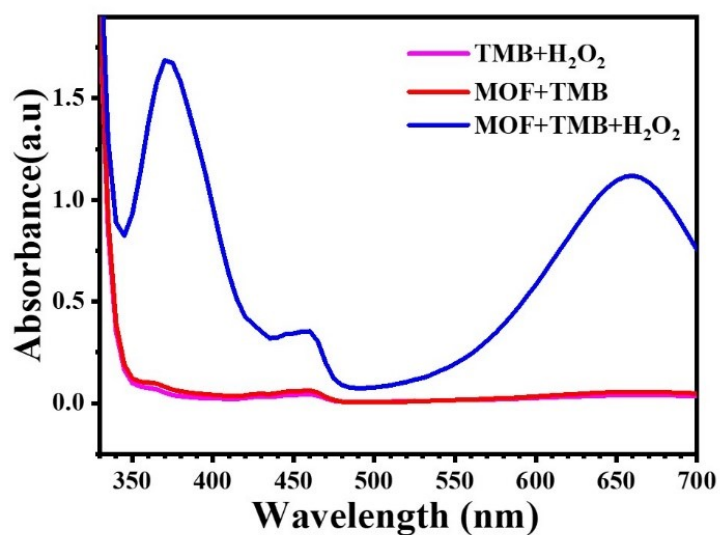

43 **Figure S5:** The various reaction systems used to assess the peroxidase-like catalytic  
 44 activity of PCN-242 (Fe<sub>2</sub>Co).  
 45

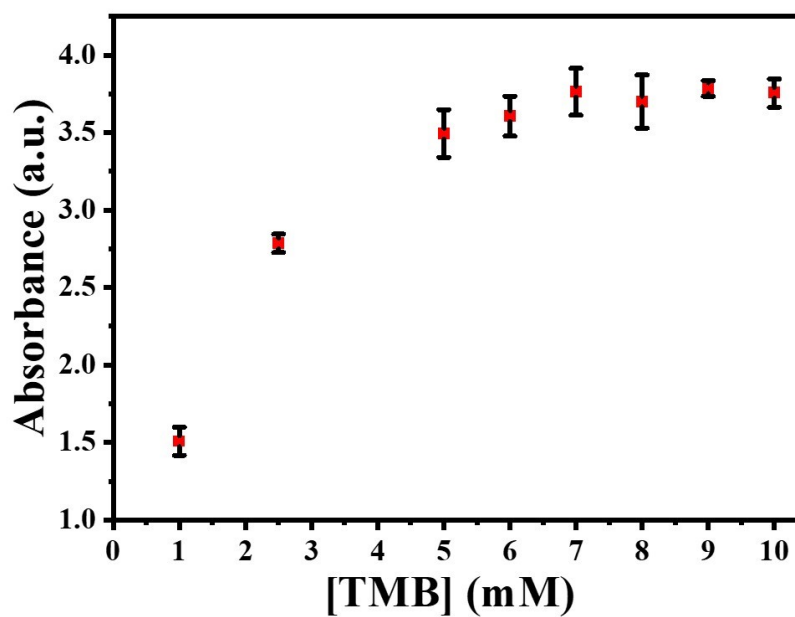

46 **Figure S6.** The peroxidase-like catalytic activity of PCN-242 (Fe<sub>2</sub>Co) was optimized  
 47 by varying the concentration of TMB.

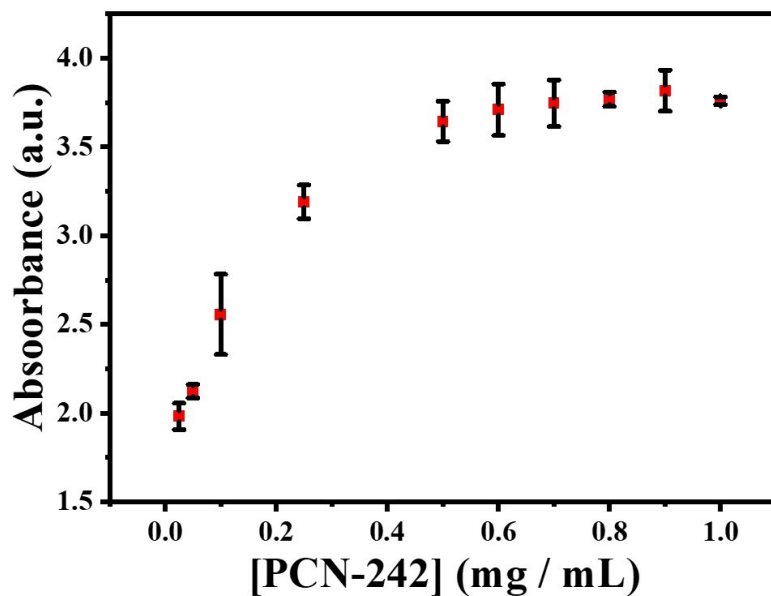

48

49 **Figure S7.** The peroxidase-like catalytic activity of PCN-242 ( $\text{Fe}_2\text{Co}$ ) was optimized  
 50 by varying the concentration of MOF in the solution.

51

52

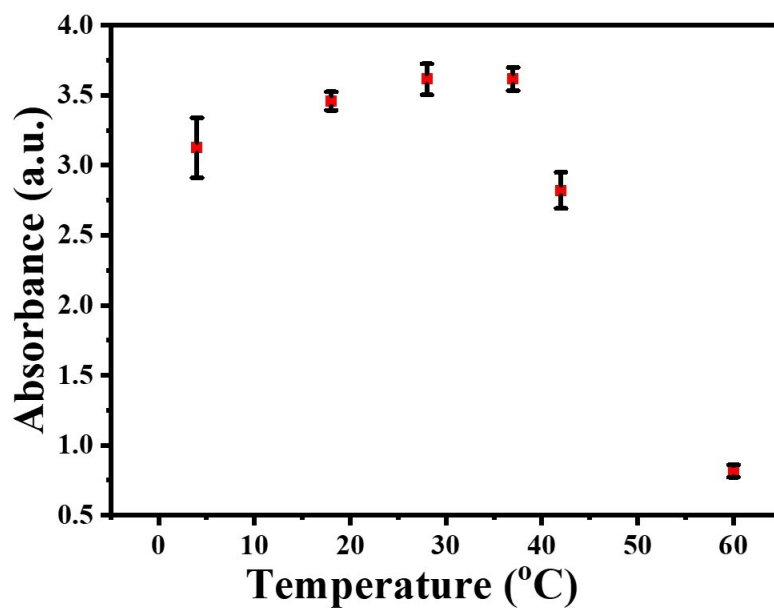

53

54 **Figure S8.** The peroxidase-like catalytic activity of PCN-242 ( $\text{Fe}_2\text{Co}$ ) was conducted  
 55 at various temperatures.

56

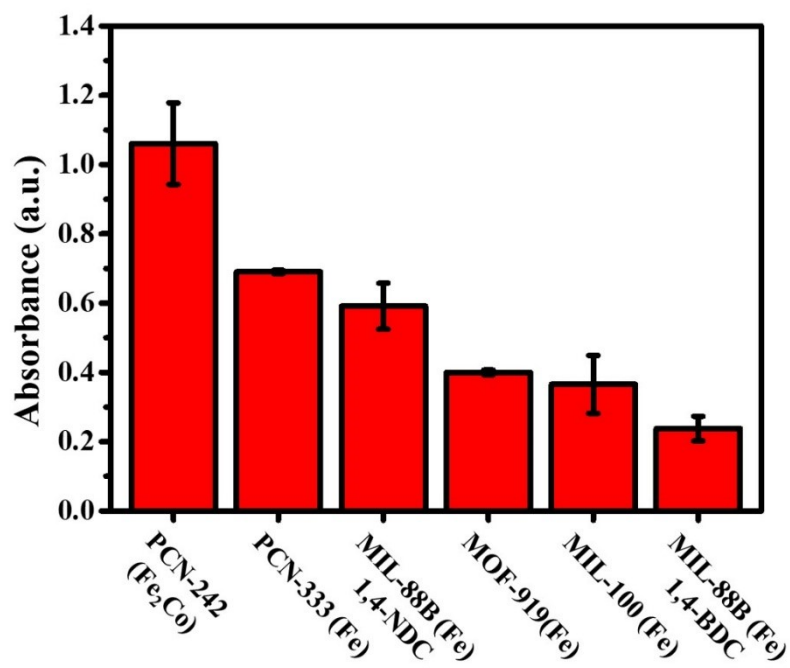

58 **Figure S9.** Peroxidase-like catalytic activity comparison of various iron-based MOFs.

59 From left to right: 1) PCN-242(Fe<sub>2</sub>Co), 2) PCN-333(Fe), 3) MIL-88B(Fe) (1,4-NDC),

60 4) MOF-919(Fe), 5) MIL-100(Fe), and 6) MIL-88B(Fe) (1,4-BDC).

61

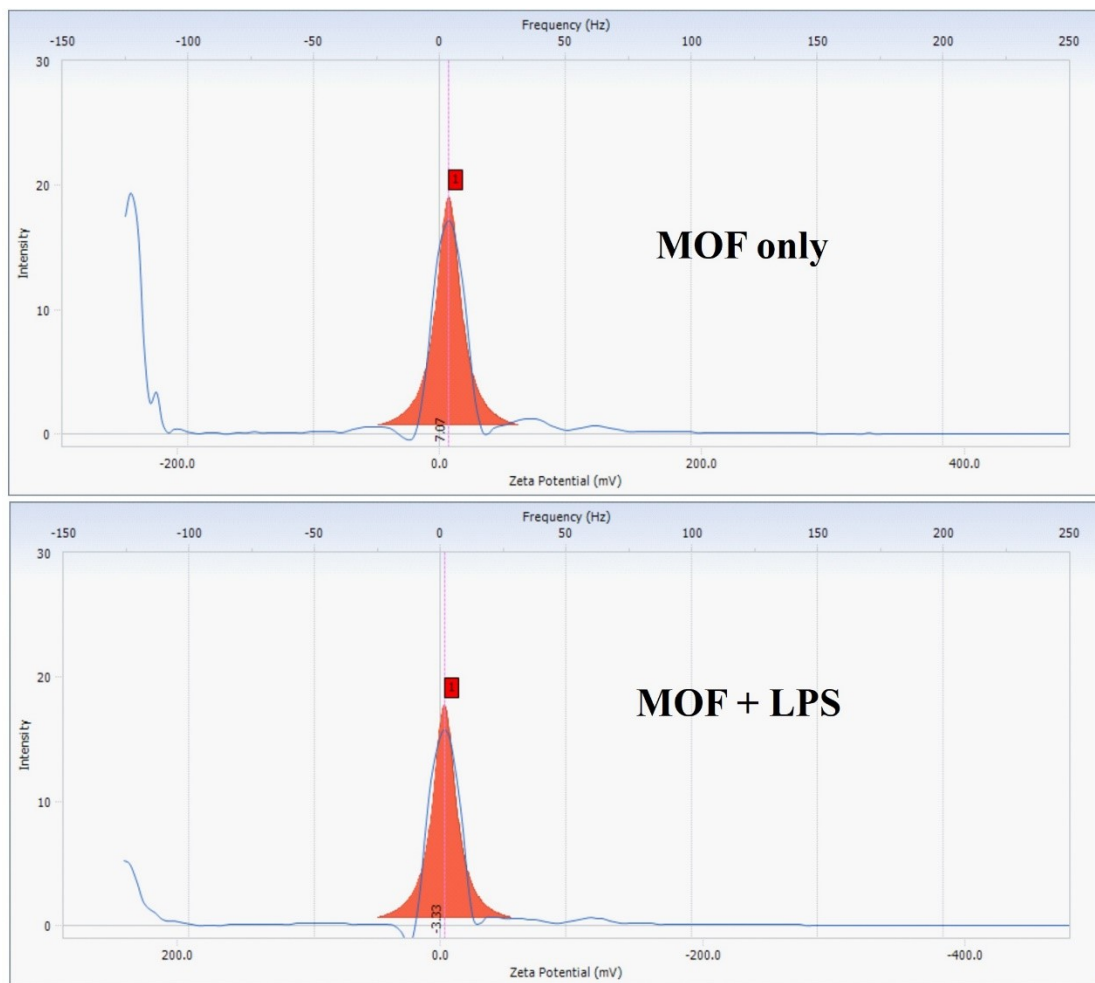

62

63 **Figure S10.** The zeta potential analysis of PCN-242 ( $\text{Fe}_2\text{Co}$ ) MOF before and after  
64 LPS addition.

65

66



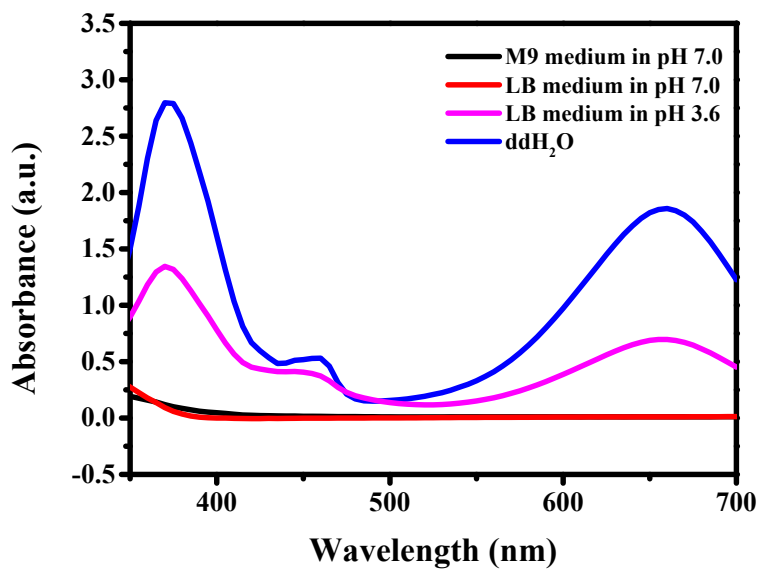

67

68 **Figure S11.** Evaluation of PCN-242 MOF peroxidase activity across different  
 69 reaction media, highlighting the impact of varying conditions on catalytic  
 70 performance.

71

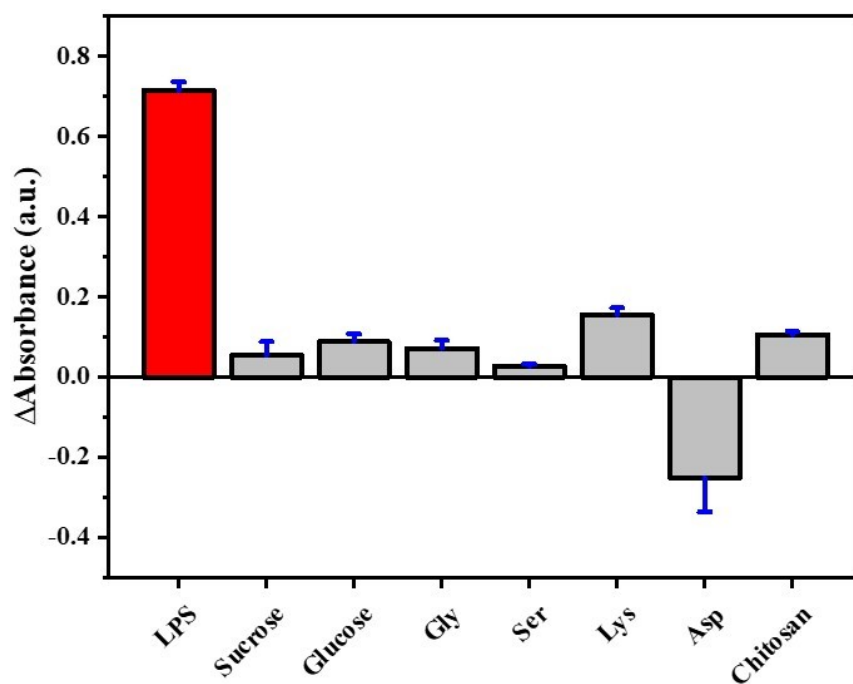

72

73 **Figure S12.** The potential interference compounds test for LPS selectivity analysis.

74

75

76

77

78

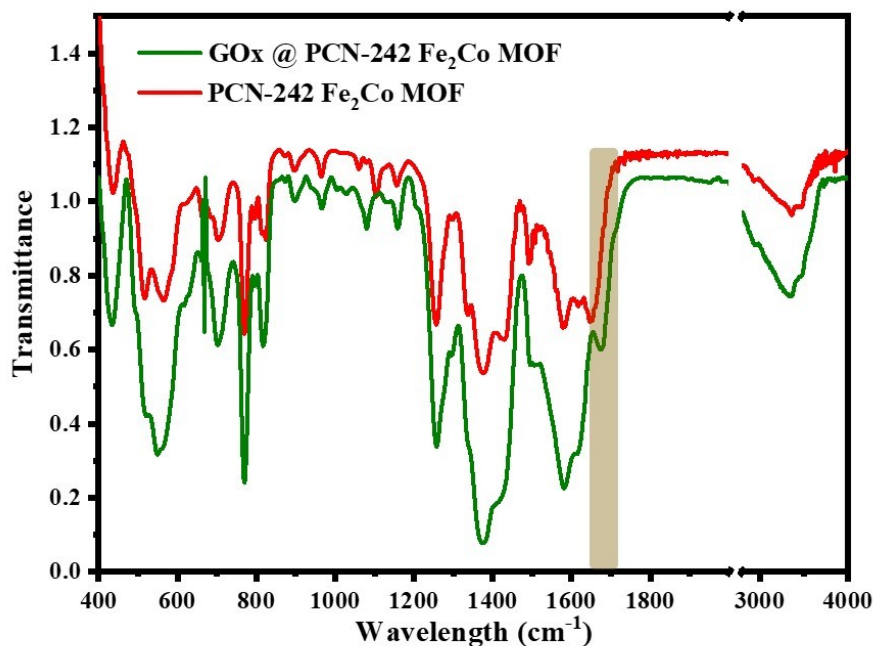

79

80 **Figure S13.** FT-IR spectra showing the characteristic vibrational modes of PCN-  
 81 242( $\text{Fe}_2\text{Co}$ ) MOF before and after modification with GOx.

82

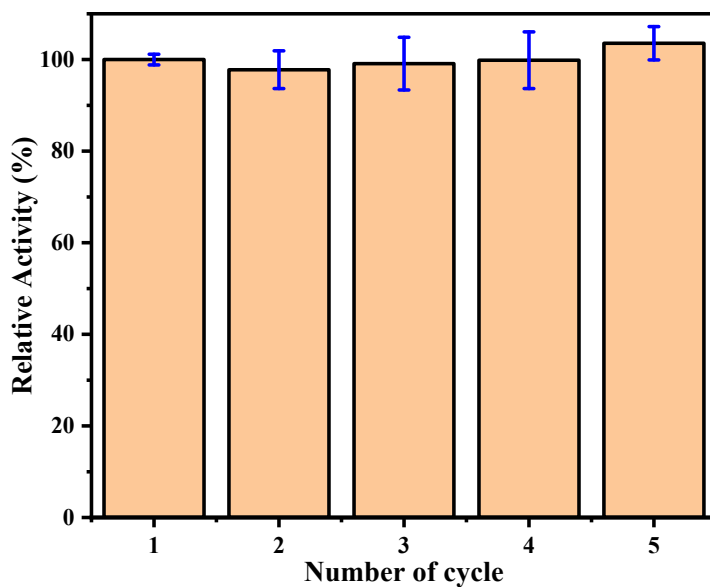

83 **Figure S14.** GOx@PCN-242 ( $\text{Fe}_2\text{Co}$ ) was utilized for glucose detection and for  
 84 recycling the enzyme-MOF composite.

85

86

87

88

89

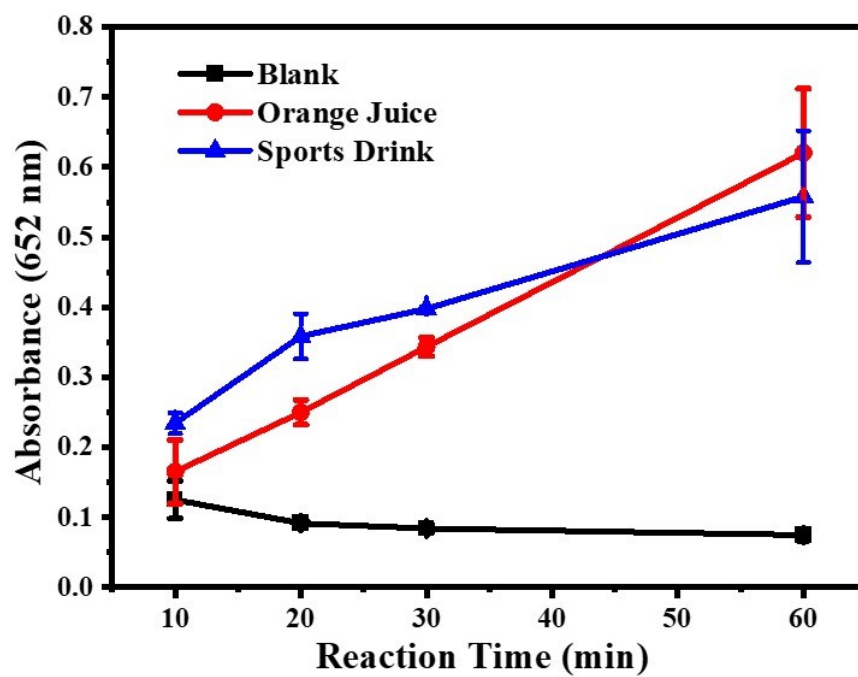

90

91 **Figure S15.** Glucose detection in diluted orange juice and sports drinks using the  
92 GOx@PCN-242 Fe<sub>2</sub>Co MOF cascade reaction.

93 **References:**

- 94 1. L. Gao, J. Zhuang, L. Nie, J. Zhang, Y. Zhang, N. Gu, T. Wang, J. Feng, D.  
95 Yang and S. Perrett, *Nature nanotechnology*, 2007, **2**, 577-583.
- 96 2. W. Xu, L. Jiao, H. Yan, Y. Wu, L. Chen, W. Gu, D. Du, Y. Lin and C. Zhu, *ACS*  
97 *applied materials & interfaces*, 2019, **11**, 22096-22101.
- 98 3. F.-X. Qin, S.-Y. Jia, F.-F. Wang, S.-H. Wu, J. Song and Y. Liu, *Catalysis*  
99 *Science & Technology*, 2013, **3**, 2761-2768.
- 100 4. Q. Jiang, Y. Xiao, A. N. Hong, Z. Gao, Y. Shen, Q. Fan, P. Feng and W.  
101 Zhong, *ACS Applied Materials & Interfaces*, 2022, **14(37)**, 41800-41808.
- 102 5. Q. Jiang, Y. Xiao, A. N. Hong, Y. Shen, Z. Li, P. Feng and W. Zhong, *ACS*  
103 *Sensors*, 2023, **8**, 1658-1666.
- 104
